# Supplementary material for: Synthesis and Optimization of Superhydrophilic-Superoleophobic Chitosan–Silica/HNT Nanocomposite Coating for Oil–Water Separation Using Response Surface Methodology
Source: MDPI journal article supplement (doi:10.3390/nano12203673), 2022-10-19
Supplement: s1 [file s1]

# SUPPLEMENTARY DATA

Table S1 The crystalline information of each nanoparticle

| Sample     | Peak position | d-spacing | full width at half maximum (FWHM) | Crystallite size (nm) | Average crystallite size (nm) |
|------------|---------------|-----------|-----------------------------------|-----------------------|-------------------------------|
| CTS-Si/HNT | 9.8           | 0.877     | 2.82                              | 2.96                  | 3.15                          |
|            | 17.78         | 0.438     | 1.617                             | 5.20                  |                               |
|            | 34.24         | 0.454     | 6.75                              | 1.29                  |                               |
| HNT        | 11.72         | 0.749     | 1.183                             | 11.14                 | 18.37                         |
|            | 20.23         | 0.469     | 0.899                             | 17.98                 |                               |
|            | 34.86         | 0.335     | 2.01                              | 25.98                 |                               |
| CTS-Si     | 9.54          | 0.961     | 3.52                              | 8.67                  | 13.74                         |
|            | 19.80         | 0.448     | 1.37                              | 18.82                 |                               |

Table S2 TGA data of CTS-Si/HNT nanocomposite in air

| Nanocomposite | 5% degradation temperature (°C) | 10% degradation temperature (°C) | Structural dehydroxylation temperature (°C) | Maximum weight loss onset temperature (°C) |
|---------------|---------------------------------|----------------------------------|---------------------------------------------|--------------------------------------------|
| HNT           | 342                             | 400                              | 420                                         | 730                                        |
| Chitosan      | 167                             | 313                              | 600                                         | 700                                        |
| CTS-Si/HNT    | 384                             | 487                              | 570                                         | 740                                        |
